# Supplementary material for: Age-associated chromatin relaxation is enhanced in Huntington’s disease mice
Source: publisher site journal article supplement (doi:10.18632/aging.101193), 2017-03-12
Supplement: Supplementary file 1 [file aging-v9i3-101193-supplementary-material-SD1.pdf]

## SUPPLEMENTARY MATERIALS

### Supplemental Figures.

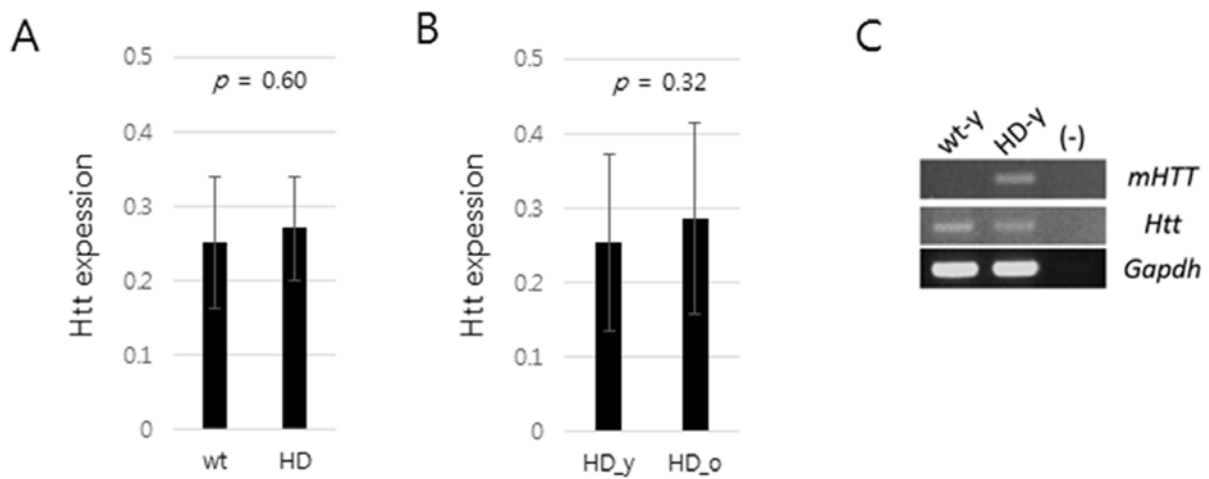

**Figure S1. Huntingtin (*Htt*) expression in wild-type (wt) and mouse models of Huntington's disease (HD).** (A) *Htt* expression levels in splenic T cells from wt and HD mice. Average expression levels of young and aged mice were calculated. (B) *Htt* levels in young (HD\_y) and aged (HD\_o) HD mice. (C) Detection of human mutant *HTT* (*mHTT*) and endogenous *Htt* gene expression in HD mice. (-), no template control.

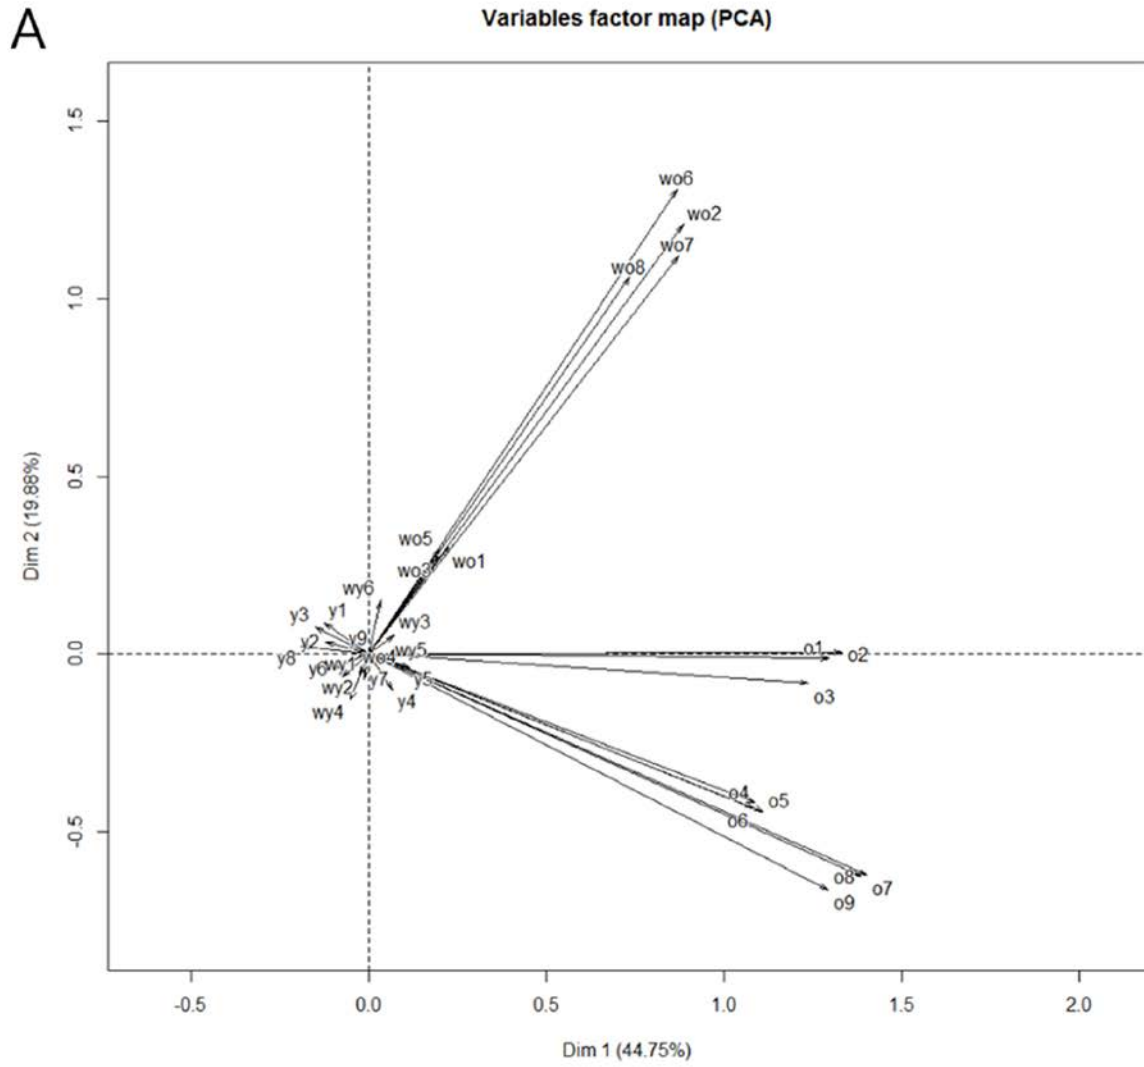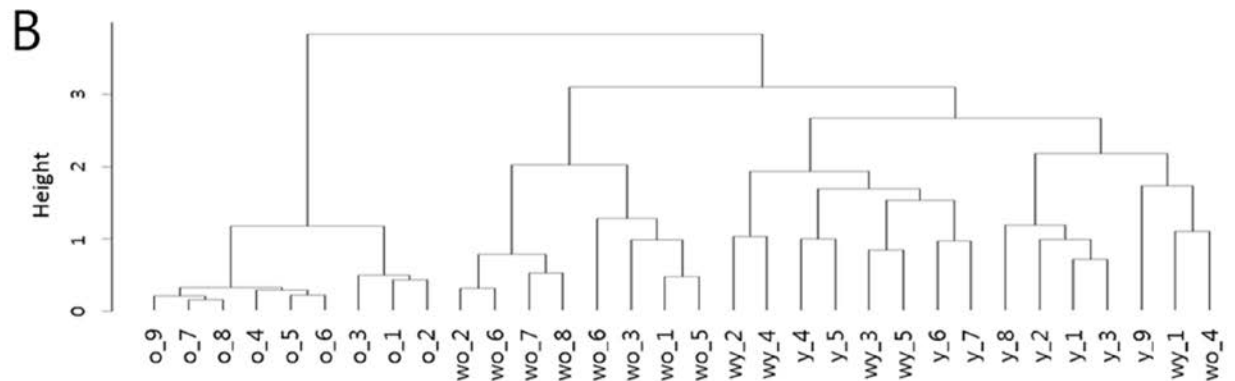

**Figure S2. Correlation analysis.** (A) Principal component analysis (PCA). Four groups are included: wild-type young (wy), wild-type old (wo), Huntington's disease (HD) young (y), and HD old (o). (B) Unsupervised cluster analysis.

| Gene id  | Category   | No. Count | M/R ratio* in young | M/R ratio* in aged | log <sub>2</sub> FC | P-val       | FDR         |
|----------|------------|-----------|---------------------|--------------------|---------------------|-------------|-------------|
| Ig1_55   | Ageing     | 510       | 0.004               | 0.392              | 6.515               | 1.39E-16    | 4.41E-14    |
| Clu_2    | Ageing     | 13224     | 0.046               | 1.457              | 4.980               | 1.4E-12     | 2.23E-10    |
| PADI4_1  | Arg_meth   | 3139      | 0.002               | 0.205              | 6.530               | 4.02E-12    | 4.26E-10    |
| Clu_1    | Ageing     | 1268      | 0.041               | 0.636              | 3.951               | 5.89E-08    | 0.0000468   |
| PRMT6_1  | Arg_meth   | 919       | 0.041               | 0.591              | 3.847               | 0.00000116  | 0.0000739   |
| Cd44_1   | Ageing     | 2140      | 0.010               | 0.195              | 4.248               | 0.00000057  | 0.0000302   |
| Casp1_2  | Ageing     | 5674      | 0.353               | 2.104              | 2.577               | 0.000000977 | 0.0000444   |
| RPRD1A_2 | etc        | 5537      | 0.066               | 0.821              | 3.644               | 0.00000123  | 0.000049    |
| Casp1_1  | Ageing     | 14597     | 0.870               | 5.325              | 2.613               | 0.00000431  | 0.000152169 |
| RNF38_5  | Ubiq       | 2148      | 0.109               | 1.130              | 3.378               | 0.0000193   | 0.000612567 |
| Il6_1    | Ageing     | 1428      | 0.007               | 0.131              | 4.138               | 0.0000591   | 0.001708404 |
| JMJD7_1  | Lys_demeth | 3779      | 0.323               | 1.534              | 2.246               | 0.000338713 | 0.008975895 |
| Rel_26   | Ageing     | 1733      | 0.145               | 0.944              | 2.704               | 0.000437244 | 0.009931695 |
| Ier3_1   | Ageing     | 463       | 0.129               | 0.855              | 2.724               | 0.000426953 | 0.009931695 |

\* M/R ratio, the ratio of the mouse sequence counts relative to the rat's counts

**Figure S3. Differentially expressed target sequences between wild-type young and aged mice.** Gene id, gene symbol\_amplicon number. Expression level of each amplicon was measured by calculating the ratio (M/R) of cDNA counts relative to rat spike-in counts. No Count, the number of read count of each amplicon. FC, fold change. FDR, false discovery rate.

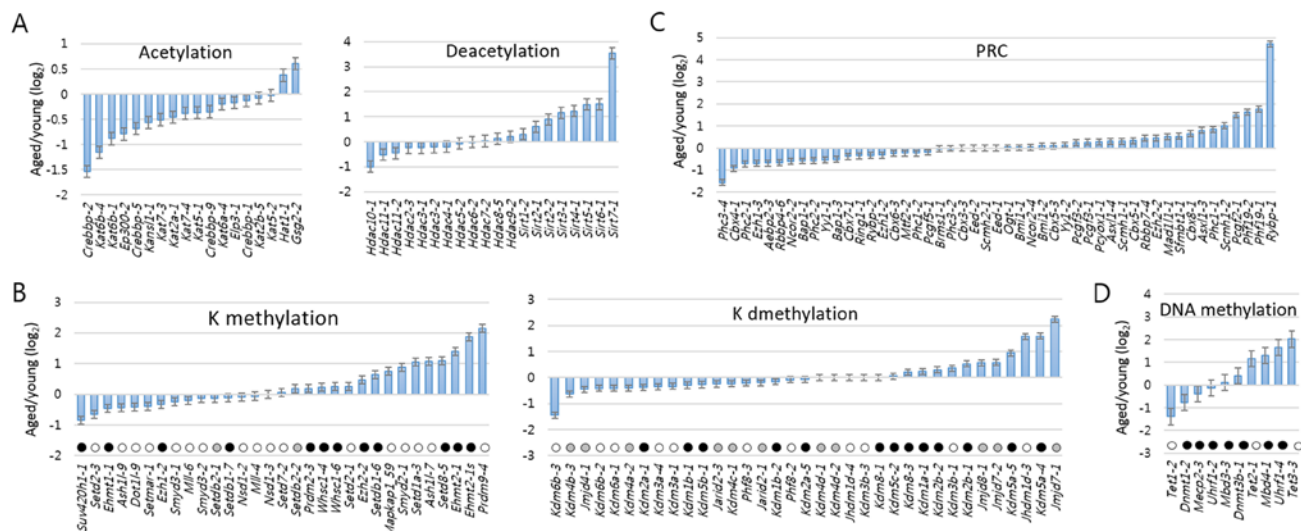

**Figure S4. Fold changes in the amount of amplicons in aged wild type mice compared to young mice.** Fold changes were measured for the epi-driver gene amplicons in the categories of acetylation and deacetylation (A), lysine (K) methylation and K demethylation (B), Polycomb-repressive complex (PRC) (C), and DNA methylation (D). In B and D, amplicons are differentially marked according to the modification effects of their proteins on chromatin accessibility: open circles indicate increased accessibility; solid circles indicate reduced accessibility; and grey circles for cases involving either increased or reduced accessibility.

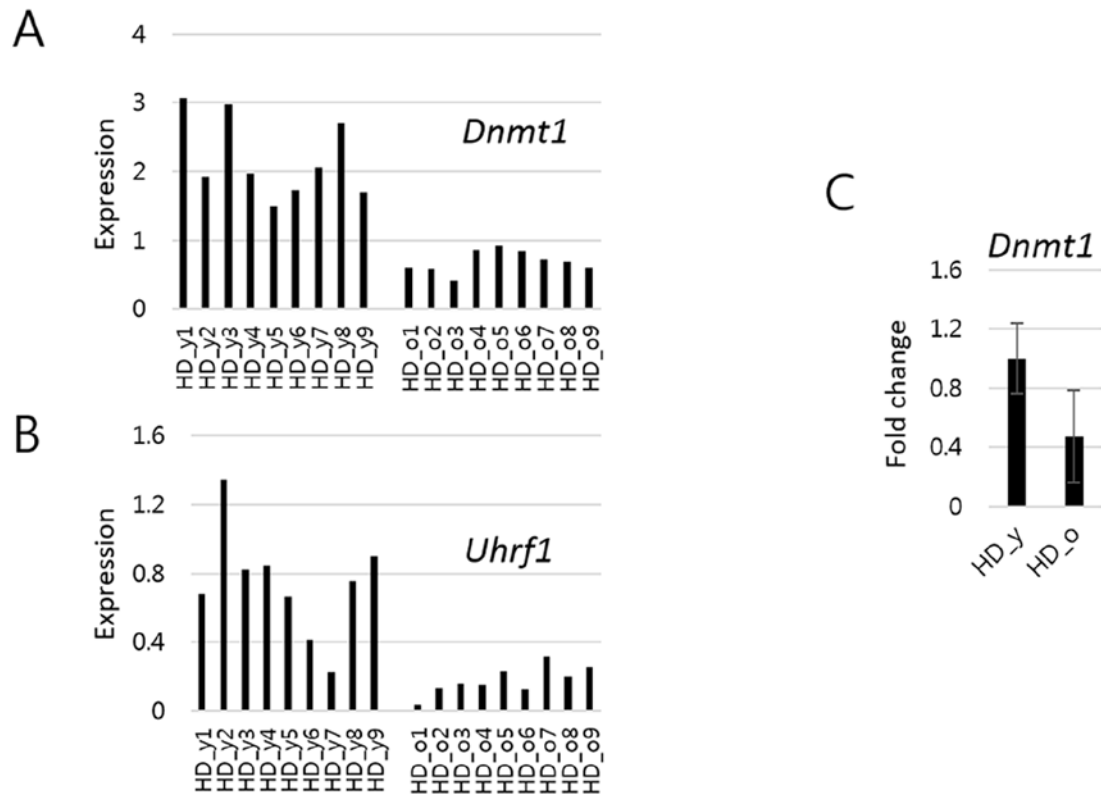

**Figure S5.** Amplicon levels of *Dnmt1* (A) and *Uhrf1* (B) in young and aged mouse models of Huntington's disease (HD\_y and HD\_o, respectively). (C) quantitative real-time PCR analysis of *Dnmt1* gene expression.
